# Supplementary material
Source: PubMed Central journal article supplement (PMC3873191)
Supplement: gmb-36-586-s001.pdf [file gmb-36-586-s001.pdf]

Table S1 - Geographic locales included in this study, including the individuals sampled at each site, and the source of the biological material analyzed here.

| Site Name (Region, Country)           | No. of individuals | Sample IDs                                                                     | Geographic (Lat/ Long) | Coordinates | Contact and/or Institution                     |
|---------------------------------------|--------------------|--------------------------------------------------------------------------------|------------------------|-------------|------------------------------------------------|
| British Columbia, Canada              | 3                  | Pco242, Pco258, Pco357                                                         | 54.9,-124.5            |             | LGD/NCI                                        |
| Oregon, USA                           | 1                  | Pco007                                                                         | 43.935833,-120.575     |             | LGD/NCI                                        |
| Idaho, USA                            | 1                  | Pco340                                                                         | 43.7,-116              |             | LGD/NCI                                        |
| Yellowstone National Park, USA        | 2                  | Pco372, Pco377                                                                 | 44.460556,-110.827778  |             | LGD/NCI                                        |
| Texas, USA                            | 4                  | Pco036, Pco037, Pco128, Pco356                                                 | 25.833333,-93.516667   |             | LGD/NCI                                        |
| Florida, USA                          | 2                  | Pco077, Pco348                                                                 | 24.5,-79.8             |             | LGD/NCI                                        |
| El Petén, Guatemala                   | 2                  | Pco556, Pco446                                                                 | 16.9,-89.9             |             | LGD/NCI                                        |
| Northern Central Guatemala            | 1                  | Pco555                                                                         | 15.5,-90.25            |             | LGD/NCI                                        |
| Southern Guatemala                    | 1                  | Pco557                                                                         | 15.5,-90.25            |             | LGD/NCI                                        |
| Granada, Nicaragua                    | 1                  | Pco549                                                                         | 11.933333,-85.95       |             | LGD/NCI                                        |
| Chontales, Nicaragua                  | 1                  | Pco550                                                                         | 12.083333,-85.4        |             | LGD/NCI                                        |
| Matagalpa, Nicaragua                  | 1                  | Pco552                                                                         | 12.916667,-85.916667   |             | LGD/NCI                                        |
| Northern Nicaragua                    | 2                  | Pco554, Pco551                                                                 | 12.904167,-84.921944   |             | LGD/NCI                                        |
| Nueva Guinea, Nicaragua               | 1                  | Pco553                                                                         | 11.683333,-84.45       |             | LGD/NCI                                        |
| Costa Rica                            | 4                  | Pco545, Pco547, Pco548, Pco546                                                 | 10,-84                 |             | LGD/NCI                                        |
| Guanacaste, Costa Rica                | 1                  | Pco544                                                                         | 10.433333,-85.4        |             | LGD/NCI                                        |
| Darién, Panama                        | 2                  | Pco541, Pco542                                                                 | 8.408333,-77.915       |             | LGD/NCI                                        |
| Falcón, Venezuela                     | 2                  | Pco704, Pco703                                                                 | 8,-66                  |             | LGD/NCI                                        |
| Barquisimeto, Venezuela               | 1                  | Pco705                                                                         | 10.066667,-69.316667   |             | LGD/NCI                                        |
| Tefé, AM, BR                          | 1                  | bPco358                                                                        | -3.353889,-64.710833   |             | Diogo Faria/<br>CETAS/IBAMA/<br>Pró-Carnívoros |
| Presidente Figueiredo, AM, BR         | 1                  | bPco342                                                                        | -2.017222,-60.025      |             | Diogo Faria/<br>CETAS/IBAMA/<br>Pró-Carnívoros |
| Rio Preto da Eva, AM, BR              | 1                  | bPco343                                                                        | -2.698889,-59.7        |             | Diogo Faria/<br>CETAS/IBAMA/<br>Pró-Carnívoros |
| Antofagasta, Chile                    | 1                  | Pco214                                                                         | -24.616667,-69.533333  |             | LGD/NCI                                        |
| Vicuña, Chile                         | 1                  | Pco208                                                                         | -33,-71.516667         |             | LGD/NCI                                        |
| Ovalle, Chile                         | 2                  | Pco207, Pco215                                                                 | -30.6,-71.2            |             | LGD/NCI                                        |
| Mendoza, Argentina                    | 3                  | Pco570, Pco573                                                                 | -32.88,-69.00          |             | LGD/NCI                                        |
| Santiago, Chile/ Mendoza, Argentina   | 10                 | Pco201, Pco209, Pco210, Pco211, Pco212, Pco216, Pco217, Pco564, Pco570, Pco573 | -33.073131,-70.059814  |             | LGD/NCI                                        |
| Angol/Coñaripe, Chile                 | 1                  | Pco213                                                                         | -32.653056,-70.011944  |             | LGD/NCI                                        |
| Villarica, Chile                      | 1                  | Pco218                                                                         | -39.266667,-72.216667  |             | LGD/NCI                                        |
| Torres Del Paine National Park, Chile | 1                  | Pco200                                                                         | -50.983056,-72.966389  |             | LGD/NCI                                        |
| Punta Arenas, Chile                   | 1                  | Pco202                                                                         | -53.15,-70.916667      |             | LGD/NCI                                        |
| Chubut, Argentina                     | 1                  | Pco567                                                                         | -45.8,-67.5333         |             | LGD/NCI                                        |
| La Pampa, Argentina                   | 1                  | Pco565                                                                         | -36.833333,-66         |             | LGD/NCI                                        |
| Cordoba, Argentina                    | 1                  | Pco577                                                                         | -31.416667,-64.183333  |             | LGD/NCI                                        |
| Northern Argentina                    | 1                  | Pco562                                                                         | -23.408333,-64.427778  |             | LGD/NCI                                        |
| Uruguay                               | 2                  | Pco580, Pco582                                                                 | -31.683333,-55.416667  |             | LGD/NCI                                        |
| Chaco, Paraguay                       | 3                  | Pco699, Pco701, Pco581                                                         | -23.0,-58.0            |             | LGD/NCI                                        |
| Potosí, Bolivia                       | 3                  | Pco706, Pco709, Pco710                                                         | -19.583333,-65.75      |             | LGD/NCI                                        |
| Santa Cruz, Bolivia                   | 2                  | Pco707, Pco708                                                                 | -17.8,-63.166667       |             | LGD/NCI                                        |
| Ponta Porã, MS, BR                    | 2                  | bPco327, bPco039                                                               | -22.535833,-55.725833  |             | Ronaldo Morato/                                |

|                                                           |    |                                                                                                                                                                |                       |                                                      |
|-----------------------------------------------------------|----|----------------------------------------------------------------------------------------------------------------------------------------------------------------|-----------------------|------------------------------------------------------|
| Jardim, MS, BR                                            | 2  | bPco035, bPco040                                                                                                                                               | -21.48,-56.137778     | Pró-Carnívoros<br>Ronaldo Morato/<br>Pró-Carnívoros  |
| Miranda, MS, BR                                           | 3  | bPco063, bPco064, bPco062                                                                                                                                      | -20.240833,-56.377778 | Fernando Azevedo/<br>Projeto Gadonça                 |
| Corumbá, MS, BR                                           | 2  | bPco037, bPco038                                                                                                                                               | -19.008889,-57.652778 | Ronaldo Morato/<br>Pró-Carnívoros                    |
| Corguinho, MS, BR                                         | 1  | bPco326                                                                                                                                                        | -19.831944,-54.828889 | Roberta Humberg/<br>CRAS                             |
| Barão de Melgaço, MT, BR                                  | 11 | bPco024, bPco025, bPco029,<br>bPco031, bPco032, bPco026,<br>bPco027, bPco028, bPco030,<br>bPco033, bPco036                                                     | -16.278889,-55.957778 | Rodrigo Jorge/<br>Pró-Carnívoros                     |
| Alta Floresta, MT, BR                                     | 1  | bPco041                                                                                                                                                        | -9.875556,-56.086111  | Fernanda Michalski<br>/Pró-Carnívoros                |
| Santarém, PA, BR                                          | 1  | bPco082                                                                                                                                                        | -2.442778,-54.707778  | Glauca Pontes                                        |
| Guaramiranga, CE, BR                                      | 1  | bPco069                                                                                                                                                        | -4.262778,-38.932778  | Marcos Renato<br>Mattos                              |
| Quixeramobim, CE, BR                                      | 1  | bPco070                                                                                                                                                        | -5.198889,-39.292778  | Marcos Renato<br>Mattos                              |
| Campina Grande, PB, BR                                    | 1  | Pco700                                                                                                                                                         | -7.230556,-35.881111  | LGD/NCI                                              |
| Araguaína, TO, BR                                         | 1  | Pco601                                                                                                                                                         | -7.190833,-48.206944  | LGD/NCI                                              |
| São Geraldo Araguaia, PA                                  | 1  | bPco346                                                                                                                                                        | -6.400833,-48.555     | Joares May/ Inst.<br>Biotrópicos                     |
| Araguaia, GO, BR                                          | 1  | Pco697                                                                                                                                                         | -13.275,-50.162778    | LGD/NCI                                              |
| Chapada Gaúcha, MG, BR                                    | 2  | bPco337; bPco338                                                                                                                                               | -15.305833,-45.617778 | Joares May, Edsel<br>Amorim Jr/ Inst.<br>Biotrópicos |
| Luziânia, GO, BR                                          | 1  | bPco333                                                                                                                                                        | -16.318611,-47.78     | COFAU                                                |
| Goiás, BR                                                 | 2  | bPco316; Pco602                                                                                                                                                | -15.933889,-50.14     | Ivaldo M. Carvalho/<br>Pró-Carnívoros;<br>LGD/NCI    |
| Bataguassu, MS, BR                                        | 1  | bPco001                                                                                                                                                        | -21.713889,-52.421944 | Projeto Porto<br>Primavera                           |
| MS, BR                                                    | 1  | bPco019                                                                                                                                                        | -20.442778,-54.645833 | Pró-Carnívoros                                       |
| Anaurilândia, MS, BR                                      | 16 | bPco020, bPco021, bPco022,<br>bPco023, bPco044, bPco045,<br>bPco046, bPco047, bPco048,<br>bPco049, bPco054, bPco056,<br>bPco057, bPco058, bPco059,<br>bPco067, | -22.187778,-52.717778 | Dênis Sana/ Pró-<br>Carnívoros                       |
| Batayporã, MS, BR                                         | 2  | bPco043, Pco712                                                                                                                                                | -22.295,-53.270833    | Dênis Sana/<br>Pró-Carnívoros/<br>LGD/NCI            |
| Ivinhema, MS, BR                                          | 7  | bPco050, bPco051, bPco052,<br>bPco053, bPco055, bPco060,<br>bPco066                                                                                            | -22.305,-53.815       | Dênis Sana/<br>Pró-Carnívoros                        |
| Ilha Solteira, SP, BR                                     | 2  | bPco319, bPco320                                                                                                                                               | -20.432778,-51.342778 | Rodrigo Jorge/<br>Pró-Carnívoros                     |
| Porto Primavera, MS, BR                                   | 2  | bPco002, Pco702                                                                                                                                                | -22.58,-53.058889     | LGD/NCI                                              |
| Bataguassu, MS, BR                                        | 1  | bPco042                                                                                                                                                        | -21.713889,-52.421944 | Dênis Sana/<br>Pró-Carnívoros                        |
| Parque Nacional do Monte Pascoal,<br>Porto Seguro, BA, BR | 1  | bPco349                                                                                                                                                        | -16.45,-39.065        | Sandra Becker                                        |
| Centralina, MG, BR                                        | 1  | bPco071                                                                                                                                                        | -18.583889,-49.198889 | Frederico Genésio<br>Lemos and Hugo C.<br>M. Costa   |
| P. E. Cantareira, SP, BR                                  | 1  | bPco034                                                                                                                                                        | -23.318889,-46.586944 | Pró-Carnívoros                                       |
| Extrema, MG, BR                                           | 1  | bPco331                                                                                                                                                        | -22.855,-46.317778    | Pró-Carnívoros                                       |
| Getulina, SP, BR                                          | 1  | bPco351                                                                                                                                                        | -21.798889,-49.928889 | Alexandre Vogliotti<br>and Javier A.<br>/NUPECCE     |
| Cananéia, SP, BR                                          | 1  | bPco014                                                                                                                                                        | -25.015,-47.926944    | Fábio Olmos                                          |
| Análândia, SP, BR                                         | 2  | bPco317, Pco dot-d25                                                                                                                                           | -22.125833,-47.662778 | Renata Miotto/<br>UFSCar                             |

|                                |   |                                                   |                       |                                          |
|--------------------------------|---|---------------------------------------------------|-----------------------|------------------------------------------|
| Rio Claro/Iracemópolis, SP, BR | 1 | Pco dot-d23                                       | -22.540278,-47.593611 | Renata Miotto/<br>UFSCar                 |
| Paulínia, SP, BR               | 1 | Pco dot-d45                                       | -22.761111,-47.154167 | Renata Miotto/<br>UFSCar                 |
| Sertãozinho, SP, BR            | 1 | Pco dot-d51                                       | -21.198611,-48.170278 | Renata Miotto/<br>UFSCar                 |
| Northwestern SP, BR            | 1 | Pco599                                            | -20.512778,-50.351944 | LGD/NCI                                  |
| Ribeirão Branco, SP, BR        | 1 | bPco318                                           | -24.220833,-48.765833 | Ronaldo Morato/<br>Pró-Carnívoros        |
| Itapetininga, SP, BR           | 1 | bPco302                                           | -23.591944,-48.052778 | Ronaldo Morato/<br>Pró-Carnívoros        |
| Ribeirão Preto, SP, BR         | 1 | bPco332                                           | -21.177778,-47.81     | Jorge Bin/<br>Pró-Carnívoros             |
| Itirapina, SP, BR              | 1 | Pco dot-d29                                       | -22.240556,-47.806667 | Renata Miotto/<br>UFSCar                 |
| Itirapina, SP, BR              | 1 | Pco dot-d99                                       | -22.351944,-47.915278 | Renata Miotto/<br>UFSCar                 |
| Matão, SP, BR                  | 1 | Pco dot-d42                                       | -21.585833,-48.446944 | Renata Miotto/<br>UFSCar                 |
| Catanduva, SP, BR              | 1 | Pco dot-d43                                       | -21.142222,-49.00833  | Renata Miotto/<br>UFSCar                 |
| Cajuru, SP, BR                 | 1 | Pco dot-d44                                       | -21.17,-47.294167     | Renata Miotto/<br>UFSCar                 |
| Araraquara, SP, BR             | 1 | Pco dot-d70                                       | -21.736389,-48.170278 | Renata Miotto/<br>UFSCar                 |
| Ibirarema, SP, BR              | 1 | bPco315                                           | -22.817778,-50.072778 | Elizeu P. Ribeiro/<br>IBAMA              |
| Londrina, PR, BR               | 1 | bPco080                                           | -23.31,-51.162778     | Fernando Jerep                           |
| Blumenau, SC, BR               | 2 | PC26cc, PC27cc                                    | -26.908889,-49.072222 | Camila S. Castilho/<br>Projeto Leão Baio |
| Lages, SC, BR                  | 6 | PC08cc, PC10cc, PC15cc,<br>PC18cc, PC19cc, PC23cc | -27.815833,-50.325833 | Camila S. Castilho/<br>Projeto Leão Baio |
| Ponta Alta, SC, BR             | 1 | PC11cc                                            | -27.484167,-50.380278 | Camila S. Castilho/<br>Projeto Leão Baio |
| São Joaquim, SC, BR            | 2 | PC20cc, PC49cc                                    | -28.293889,-49.931667 | Camila S. Castilho/<br>Projeto Leão Baio |
| Urubici, SC, BR                | 6 | PC01cc, PC03cc, PC04cc,<br>PC06cc, PC07cc, PC22cc | -28.015000,-49.591667 | Camila S. Castilho/<br>Projeto Leão Baio |

USA= United States of America, BR= Brazil, AM= Amazonas State, BA= Bahia State, CE= Ceará State, GO= Goiás State, MG= Minas Gerais State, MS= Mato Grosso do Sul State, MT= Mato Grosso State, PA= Pará State, PB= Paraíba State, PR= Paraná State, SC= Santa Catarina State, SP= São Paulo State. LGD/NCI: Laboratory of Genomic Diversity, National Cancer Institute, USA; CETAS: Centro de Triagem de Animais Silvestres; COFAU: Coordenação de Proteção de Espécies da Fauna; CRAS: Centro de Reabilitação de Animais Silvestres; IBAMA: Instituto Brasileiro do Meio Ambiente e dos Recursos Naturais Renováveis; NUPECCE: Núcleo de Pesquisa e Conservação em Cervídeos.
