# Supplementary material
Source: PubMed Central journal article supplement (PMC3873191)
Supplement: gmb-36-586-s002.pdf [file gmb-36-586-s002.pdf]

Table S2 - *Puma concolor* samples analyzed in this study, including their locale of origin, biome (South American samples only), ND5 haplotype and affiliation in the geographic groups defined by the AMOVA (see text for details).

| Individual | Sampling Locale                  | Biome                               | Haplotype | AMOVA group |
|------------|----------------------------------|-------------------------------------|-----------|-------------|
| bPco001    | Bataguassu, MS, BR               | Atlantic Forest                     | H01       | CNESA       |
| bPco002    | Usina de Porto Primavera, MS, BR | Atlantic Forest                     | H02       | CNESA       |
| bPco014    | Cananéia, SP, BR                 | Atlantic Forest                     | H03       | ESA         |
| bPco019    | MS, BR                           | Atlantic Forest / Cerrado/ Pantanal | H01       | CNESA       |
| bPco020    | Anaurilândia, MS, BR             | Atlantic Forest                     | H02       | CNESA       |
| bPco021    | Anaurilândia, MS, BR             | Atlantic Forest                     | H01       | CNESA       |
| bPco022    | Anaurilândia, MS, BR             | Atlantic Forest                     | H14       | CNESA       |
| bPco023    | Anaurilândia, MS, BR             | Atlantic Forest                     | H01       | CNESA       |
| bPco024    | Barão de Melgaço, MT, BR         | Pantanal                            | H02       | CNESA       |
| bPco025    | Pantanal - MT, BR                | Pantanal                            | H02       | CNESA       |
| bPco026    | Barão de Melgaço, MT, BR         | Pantanal                            | H03       | CNESA       |
| bPco027    | Barão de Melgaço, MT, BR         | Pantanal                            | H21       | CNESA       |
| bPco028    | Pantanal, MT, BR                 | Pantanal                            | H21       | CNESA       |
| bPco029    | Barão de Melgaço, MT, BR         | Pantanal                            | H02       | CNESA       |
| bPco030    | Barão de Melgaço, MT, BR         | Pantanal                            | H21       | CNESA       |
| bPco031    | Barão de Melgaço, MT, BR         | Pantanal                            | H02       | CNESA       |
| bPco032    | Pantanal, MT, BR                 | Pantanal                            | H02       | CNESA       |
| bPco033    | Pantanal, MT, BR                 | Pantanal                            | H06       | CNESA       |
| bPco034    | PE Cantareira, SP, BR            | Atlantic Forest                     | H01       | CNESA       |
| bPco035    | Jardim, MS, BR                   | Cerrado                             | H07       | CNESA       |
| bPco036    | Pantanal - MS ou MT, BR          | Pantanal                            | H06       | CNESA       |
| bPco037    | Corumbá, MS, BR                  | Pantanal                            | H05       | CSSA        |
| bPco038    | Corumbá, MS, BR                  | Pantanal                            | H05       | CSSA        |
| bPco039    | Ponta Porã, MS, BR               | Cerrado                             | H09       | CNESA       |
| bPco040    | Jardim, MS, BR                   | Cerrado                             | H10       | CNESA       |
| bPco041    | Alta Floresta, MT, BR            | Amazon Forest                       | H11       | CNESA       |

|         |                      |                             |     |       |
|---------|----------------------|-----------------------------|-----|-------|
| bPco042 | Bataguassu, MS, BR   | Atlantic Forest             | H02 | CNESA |
| bPco043 | Batayporã, MS, BR    | Atlantic Forest             | H01 | CNESA |
| bPco044 | Anaurilândia, MS, BR | Atlantic Forest             | H01 | CNESA |
| bPco045 | Anaurilândia, MS, BR | Atlantic Forest             | H01 | CNESA |
| bPco046 | Anaurilândia, MS, BR | Atlantic Forest             | H02 | CNESA |
| bPco047 | Anaurilândia, MS, BR | Atlantic Forest             | H07 | CNESA |
| bPco048 | Anaurilândia, MS, BR | Atlantic Forest             | H10 | CNESA |
| bPco049 | Anaurilândia, MS, BR | Atlantic Forest             | H01 | CNESA |
| bPco050 | Ivinhema, MS, BR     | Atlantic Forest             | H10 | CNESA |
| bPco051 | Ivinhema, MS, BR     | Atlantic Forest             | H10 | CNESA |
| bPco052 | Ivinhema, MS, BR     | Atlantic Forest             | H10 | CNESA |
| bPco053 | Ivinhema, MS, BR     | Atlantic Forest             | H01 | CNESA |
| bPco054 | Anaurilândia, MS, BR | Atlantic Forest             | H09 | CNESA |
| bPco055 | Ivinhema, MS, BR     | Atlantic Forest             | H14 | CNESA |
| bPco056 | Anaurilândia, MS, BR | Atlantic Forest             | H01 | CNESA |
| bPco057 | Anaurilândia, MS, BR | Atlantic Forest             | H09 | CNESA |
| bPco058 | Anaurilândia, MS, BR | Atlantic Forest             | H10 | CNESA |
| bPco059 | Anaurilândia, MS, BR | Atlantic Forest             | H10 | CNESA |
| bPco060 | Ivinhema, MS, BR     | Atlantic Forest             | H07 | CNESA |
| bPco062 | Miranda_MS_BR        | Pantanal                    | H12 | CSSA  |
| bPco063 | Miranda_MS_BR        | Pantanal                    | H07 | CSSA  |
| bPco064 | Miranda_MS_BR        | Pantanal                    | H12 | CSSA  |
| bPco066 | Ivinhema, MS, BR     | Atlantic Forest             | H01 | CNESA |
| bPco067 | Anaurilândia, MS, BR | Atlantic Forest             | H09 | CNESA |
| bPco069 | Guaramiranga, CE, BR | Caatinga (Xeric Shrublands) | H13 | CNESA |
| bPco070 | Quixeramobim, CE, BR | Caatinga (Xeric Shrublands) | H13 | CNESA |
| bPco071 | Centralina, MG, BR   | Atlantic Forest             | H03 | ESA   |
| bPco080 | Londrina, PR, BR     | Atlantic Forest             | H09 | CNESA |
| bPco082 | Santarém, PA, BR     | Amazon Forest               | H22 | CNESA |
| bPco302 | Itapetininga, SP, BR | Atlantic Forest /           | H04 | CNESA |

|         |                               | Cerrado                   |     |       |
|---------|-------------------------------|---------------------------|-----|-------|
| bPco315 | Ibirarema, SP, BR             | Atlantic Forest           | H02 | CNESA |
| bPco316 | GO, BR                        | Cerrado                   | H09 | CNESA |
| bPco317 | Analândia, SP, BR             | Cerrado                   | H02 | CNESA |
| bPco318 | Ribeirão Branco, SP, BR       | Atlantic Forest           | H09 | CNESA |
| bPco319 | SP, BR                        | Atlantic Forest           | H01 | CNESA |
| bPco320 | SP, BR                        | Atlantic Forest           | H02 | CNESA |
| bPco326 | Corguinho, MS, BR             | Atlantic Forest           | H09 | CSSA  |
| bPco327 | Ponta Porã, MS, BR            | Cerrado                   | H06 | CNESA |
| bPco331 | Extrema, MG, BR               | Atlantic Forest           | H01 | CNESA |
| bPco332 | Ribeirão Preto, SP, BR        | Cerrado                   | H15 | ESA   |
| bPco333 | Luziânia, GO, BR              | Cerrado                   | H02 | CNESA |
| bPco337 | Chapada Gaúcha, MG, BR        | Cerrado                   | H02 | CNESA |
| bPco338 | Chapada Gaúcha_MG_BR          | Cerrado                   | H02 | CNESA |
| bPco342 | Presidente Figueiredo, AM, BR | Amazon Forest             | H16 | NSA   |
| bPco343 | Rio Preto da Eva, AM, BR      | Amazon Forest             | H16 | NSA   |
| bPco346 | São Geraldo do Araguaia, PA   | Amazon Forest             | H17 | CNESA |
| bPco349 | ParNA Montel Pascoal, BA, BR  | Atlantic Forest           | H03 | ESA   |
| bPco351 | Getulina, SP, BR              | Atlantic Forest           | H02 | CNESA |
| bPco358 | Tefé, AM, BR                  | Amazon Forest             | H16 | NSA   |
| d23     | Rio Claro, SP, BR             | Atlantic Forest           | H02 | CNESA |
| d25     | Analândia, SP, BR             | Cerrado                   | H02 | CNESA |
| d29     | Itirapina, SP, BR             | Cerrado                   | H15 | CNESA |
| d42     | Matão, SP, BR                 | Cerrado                   | H15 | ESA   |
| d43     | Catanduva, SP, BR             | Atlantic Forest           | H15 | ESA   |
| d44     | Cajuru, SP, BR                | Atlantic Forest / Cerrado | H02 | ESA   |
| d45     | Paulínia, SP, BR              | Atlantic Forest           | H03 | ESA   |
| d51     | Sertãozinho, SP, BR           | Cerrado                   | H03 | CNESA |
| d70     | Araraquara, SP, BR            | Cerrado                   | H15 | ESA   |

|        |                            |                                                                      |     |        |
|--------|----------------------------|----------------------------------------------------------------------|-----|--------|
| d99    | Itirapina, SP, BR          | Cerrado                                                              | H15 | ESA    |
| PC01cc | Urubici, SC, BR            | Atlantic Forest                                                      | H02 | CNESA  |
| PC03cc | Urubici, SC, BR            | Atlantic Forest                                                      | H02 | CNESA  |
| PC04cc | Urubici, SC, BR            | Atlantic Forest                                                      | H02 | CNESA  |
| PC06cc | Urubici, SC, BR            | Atlantic Forest                                                      | H02 | CNESA  |
| PC07cc | Urubici, SC, BR            | Atlantic Forest                                                      | H02 | CNESA  |
| PC08cc | Lages, SC, BR              | Atlantic Forest                                                      | H02 | CNESA  |
| PC10cc | Lages, SC, BR              | Atlantic Forest                                                      | H02 | CNESA  |
| PC11cc | Ponta Alta, SC, BR         | Atlantic Forest                                                      | H02 | CNESA  |
| PC15cc | Lages, SC, BR              | Atlantic Forest                                                      | H10 | CNESA  |
| PC18cc | Lages, SC, BR              | Atlantic Forest                                                      | H10 | CNESA  |
| PC19cc | Lages, SC, BR              | Atlantic Forest                                                      | H02 | CNESA  |
| PC20cc | São Joaquim, SC, BR        | Atlantic Forest                                                      | H02 | CNESA  |
| PC22cc | Urubici, SC, BR            | Atlantic Forest                                                      | H02 | CNESA  |
| PC23cc | Lages, SC, BR              | Atlantic Forest                                                      | H10 | CNESA  |
| PC26cc | Blumenau, SC, BR           | Atlantic Forest                                                      | H10 | CNESA  |
| PC27cc | Blumenau, SC, BR           | Atlantic Forest                                                      | H16 | CNESA  |
| PC49cc | São Joaquim, SC, BR        | Atlantic Forest                                                      | H02 | CNESA  |
| Pco007 | Oregon, USA                |                                                                      | H23 | NCA+NA |
| Pco036 | Texas, USA                 |                                                                      | H23 | NCA+NA |
| Pco037 | Texas, USA                 |                                                                      | H23 | NCA+NA |
| Pco077 | Florida, USA               |                                                                      | H24 | NCA+NA |
| Pco128 | Texas, USA                 |                                                                      | H23 | NCA+NA |
| Pco200 | Torres Del Paine NP, Chile | Temperate grasslands and Shrublands                                  | H18 | SWSA   |
| Pco201 | Chile                      | Mediterranean scrub, montane grasslands, Desert and xeric Shrublands | H18 | SWSA   |
| Pco202 | Punta Arenas, Chile        | Patagonian Pampas (Temperate Grasslands, Savannas and Shrublands)    | H18 | SWSA   |
| Pco207 | Ovalle, IV region, Chile   | Mediterranean scrub                                                  | H19 | SWSA   |
| Pco208 | Vicuña, IV region, Chile   | Mediterranean scrub                                                  | H18 | SWSA   |
| Pco209 | Chile                      | Mediterranean scrub, montane grasslands, Desert and xeric Shrublands | H19 | SWSA   |
| Pco210 | Chile                      | Mediterranean scrub, montane grasslands, Desert and xeric Shrublands | H19 | SWSA   |

|        |                                                  |                                                                      |     |        |
|--------|--------------------------------------------------|----------------------------------------------------------------------|-----|--------|
| Pco211 | Chile                                            | Mediterranean scrub, montane grasslands, Desert and xeric Shrublands | H19 | SWSA   |
| Pco212 | Cordillheiras Santiago, Chile/Mendoza, Argentina | Montane grasslands                                                   | H18 | SWSA   |
| Pco213 | Angol/Coñaripe, Chile                            | Mediterranean scrub                                                  | H18 | SWSA   |
| Pco214 | Antofagasta, Chile                               | Mediterranean scrub                                                  | H18 | SWSA   |
| Pco215 | Ovalle, Chile                                    | Mediterranean scrub                                                  | H19 | SWSA   |
| Pco216 | Chile                                            | Mediterranean scrub, montane grasslands, Desert and xeric Shrublands | H19 | SWSA   |
| Pco217 | Chile                                            | Mediterranean scrub, montane grasslands, Desert and xeric Shrublands | H19 | SWSA   |
| Pco218 | Villarica, Chile                                 | Mediterranean scrub                                                  | H18 | SWSA   |
| Pco242 | British Columbia, Canada                         |                                                                      | H23 | NCA+NA |
| Pco258 | British Columbia, Canada                         |                                                                      | H23 | NCA+NA |
| Pco340 | Idaho, USA                                       |                                                                      | H23 | NCA+NA |
| Pco348 | Florida, USA                                     |                                                                      | H25 | NCA+NA |
| Pco356 | Texas, USA                                       |                                                                      | H23 | NCA+NA |
| Pco357 | British Columbia, Canada                         |                                                                      | H23 | NCA+NA |
| Pco372 | Yellowstone NP, USA                              |                                                                      | H23 | NCA+NA |
| Pco377 | Yellowstone NP, USA                              |                                                                      | H23 | NCA+NA |
| Pco446 | El Petén, Guatemala                              |                                                                      | H26 | NCA+NA |
| Pco541 | Darién, Panama                                   |                                                                      | H23 | SCA    |
| Pco542 | Darién, Panama                                   |                                                                      | H24 | SCA    |
| Pco544 | Guanacaste, Costa Rica                           |                                                                      | H23 | NCA+NA |
| Pco545 | Costa Rica                                       |                                                                      | H09 | SCA    |
| Pco546 | Costa Rica                                       |                                                                      | H24 | SCA    |
| Pco547 | Costa Rica                                       |                                                                      | H09 | SCA    |
| Pco548 | Costa Rica                                       |                                                                      | H09 | SCA    |
| Pco549 | Granada, Nicaragua                               |                                                                      | H23 | NCA+NA |
| Pco550 | Chontales, Nicaragua                             |                                                                      | H23 | NCA+NA |
| Pco551 | Nicaragua                                        |                                                                      | H27 | NCA+NA |
| Pco552 | Matagalpa, Nicaragua                             |                                                                      | H23 | NCA+NA |
| Pco553 | Nueva Guinea, Nicaragua                          |                                                                      | H26 | NCA+NA |

|        |                                  |                                                                                                                                    |     |        |
|--------|----------------------------------|------------------------------------------------------------------------------------------------------------------------------------|-----|--------|
| Pco554 | North Nicaragua                  |                                                                                                                                    | H23 | NCA+NA |
| Pco555 | Central-North Guatemala          |                                                                                                                                    | H26 | NCA+NA |
| Pco556 | El Petén, Guatemala              |                                                                                                                                    | H23 | NCA+NA |
| Pco557 | Sul Guatemala                    |                                                                                                                                    | H28 | NCA+NA |
| Pco562 | North Argentina                  | Montane grasslands, trop. and subtrop. moist forests, trop. and subtrop. grasslands and shrublands, trop. and subtrop. dry forests | H07 | CSSA   |
| Pco564 | Foothills of Andes, Argentina    | Montane grasslands                                                                                                                 | H07 | SWSA   |
| Pco565 | La Pampa, Argentina              | Patagonian Pampas (Temperate Grasslands, Savannas and Shrublands)                                                                  | H18 | SWSA   |
| Pco567 | Chubut, Argentina                | Patagonian Pampas (Temperate Grasslands, Savannas and Shrublands)                                                                  | H07 | SWSA   |
| Pco570 | Mendoza, Argentina               | Montane grasslands                                                                                                                 | H18 | SWSA   |
| Pco573 | Mendoza, Argentina               | Montane grasslands                                                                                                                 | H18 | SWSA   |
| Pco577 | Córdoba, Argentina               | Patagonian Pampas (Temperate Grasslands, Savannas and Shrublands)                                                                  | H07 | CSSA   |
| Pco580 | Mercedes Zoo, Uruguay            | Pampa (tropical and subtropical grasslands and shrublands)                                                                         | H09 | CSSA   |
| Pco581 | Paraguay                         | Tropical and subtrop. grasslands and shrublands, trop. and subtrop. dry forest, chaco                                              | H07 | CNESA  |
| Pco582 | Zoo Durazno, Uruguay             | Pampa (tropical and subtropical grasslands and shrublands)                                                                         | H09 | CSSA   |
| Pco599 | Northwest SP, BR                 | Atlantic Forest/ Cerrado                                                                                                           | H03 | ESA    |
| Pco601 | Araguaína, TO, BR                | Cerrado                                                                                                                            | H10 | CNESA  |
| Pco602 | Goiás, BR                        | Cerrado                                                                                                                            | H02 | CNESA  |
| Pco697 | Araguaia, GO, BR                 | Cerrado                                                                                                                            | H02 | CNESA  |
| Pco699 | Chaco Paraguay                   | Pantanal (Chaco)                                                                                                                   | H02 | CNESA  |
| Pco700 | Campina Grande, PB, BR           | Caatinga (Xeric Shrublands)                                                                                                        | H02 | CNESA  |
| Pco701 | Paraguay                         | Tropical and subtrop. grasslands and shrublands, trop. and subtrop. dry forest, chaco                                              | H01 | CNESA  |
| Pco702 | Usina de Porto Primavera, MS, BR | Atlantic Forest                                                                                                                    | H15 | CNESA  |
| Pco703 | Venezuela                        | Tropical and subtrop. moist forests, trop. and subtrop. grasslands and shrublands, trop. and subtrop. dry forest                   | H20 | NSA    |
| Pco704 | Falcón, Venezuela                | Coriano System                                                                                                                     | H16 | NSA    |
| Pco705 | Barquisimeto, Venezuela          | Coriano System                                                                                                                     | H16 | NSA    |
| Pco706 | Potosí, Bolivia                  | Montane grasslands                                                                                                                 | H09 | CSSA   |
| Pco707 | Santa Cruz, Bolivia              | Beni Savanna, Tropical and subtrop. dry broadleaf forest/Amazon Rainforest (trop. moist forests)                                   | H06 | CSSA   |
| Pco708 | Santa Cruz, Bolivia              | Tropical and subtrop. dry broadleaf forest/Amazon Rainforest (trop. moist forests)                                                 | H09 | CSSA   |

|          |                        |                    |     |       |
|----------|------------------------|--------------------|-----|-------|
| Pco709   | Potosí, Bolivia        | Montane grasslands | H09 | CSSA  |
| Pco710   | Potosí, Bolivia        | Montane grasslands | H08 | CSSA  |
| Pco712   | Batayporã, MS, BR      | Atlantic Forest    | H09 | CNESA |
| bPco015* | Campinas Zoo, BR       |                    | -   | -     |
| bPco016* | Campinas Zoo, BR       |                    | -   | -     |
| Pco558*  | Argentina              |                    | -   | -     |
| Pco559*  | Argentina              |                    | -   | -     |
| Pco560*  | Argentina              |                    | -   | -     |
| Pco561*  | Argentina              |                    | -   | -     |
| Pco571*  | Mendoza Zoo, Argentina |                    | -   | -     |
| Pco574*  | Mendoza Zoo, Argentina |                    | -   | -     |
| Pco575*  | Mendoza Zoo, Argentina |                    | -   | -     |
| Pco578*  | Cordoba Zoo, Argentina |                    | -   | -     |
| Pco579*  | Cordoba Zoo, Argentina |                    | -   | -     |
| Pco600*  | Sorocaba Zoo, SP, BR   |                    | -   | -     |

\* Samples included only in general estimates of genetic diversity indices and neutrality tests.
