# Supplementary material
Source: PubMed Central journal article supplement (PMC3873191)
Supplement: gmb-36-586-s003.pdf [file gmb-36-586-s003.pdf]

Table S3 - Nucleotide and gene diversity levels observed in *Puma concolor* mtDNA *ND5* sequences, compared to estimates for *Leopardus tigrinus* and *L. geoffroyi* based on a shared 567 bp-long *ND5* fragment.

| Species                                          | N   | Nucleotide Diversity ( $\pm$ SE)<br>per site | Gene Diversity ( $\pm$ SE) |
|--------------------------------------------------|-----|----------------------------------------------|----------------------------|
| <i>Puma concolor</i>                             | 186 | 0.00547 (0.00029)                            | 0.9200 (0.008)             |
| <i>P. concolor</i> in the<br>Neotropical ecozone | 173 | 0.00523 (0.00034)                            | 0.9130 (0.010)             |
| <i>Leopardus tigrinus</i>                        | 46  | 0.00310 (0.0004)                             | 0.7590 (0.0450)            |
| <i>L. geoffroyi</i>                              | 32  | 0.00390 (0.0004)                             | 0.8250 (0.0450)            |
