# Supplementary material
Source: PubMed Central journal article supplement (PMC3873191)
Supplement: gmb-36-586-s004.pdf [file gmb-36-586-s004.pdf]

Table S4 - Pairwise  $\Phi_{st}$  values among subcontinental groups of *Puma concolor*, estimated on the basis of p-distances (see text for details).

|        | SA       | SCA      |
|--------|----------|----------|
| SCA    | 0.61042* |          |
| NCA+NA | 0.12353* | 0.63855* |

Obs.: \* significant  $\Phi_{st}$  ( $p < 0.05$ ). Acronyms are as follows: SA (156 individuals): South America; SCA (6 individuals): Southern Central America; NA+ NCA (24 individuals): North America + Northern Central America.
