# Supplementary material
Source: PubMed Central journal article supplement (PMC3873191)
Supplement: gmb-36-586-s005.pdf [file gmb-36-586-s005.pdf]

Table S5 - Pairwise  $\Phi_{st}$  values among seven major groups of *Puma concolor*, estimated on the basis of p-distances (see text for details).

|       | NA+NCA   | SCA      | NSA      | CNESA    | ESA      | CSSA     |
|-------|----------|----------|----------|----------|----------|----------|
| SCA   | 0.63855* |          |          |          |          |          |
| NSA   | 0.83374* | 0.32381* |          |          |          |          |
| CNESA | 0.67477* | 0.21589* | 0.36745* |          |          |          |
| ESA   | 0.89971* | 0.67027* | 0.95000* | 0.71996* |          |          |
| CSSA  | 0.78669* | 0.25650* | 0.32328* | 0.27647* | 0.84102* |          |
| SWSA  | 0.73617* | 0.27918* | 0.44948* | 0.28448* | 0.76492* | 0.34911* |

Obs.: \* significant  $\Phi_{st}$  ( $p < 0.05$ ). Acronyms are as follows: NSA (6 samples): Northern South America (Northern Brazil + Venezuela); CNESA (97 samples): Central-North-Eastern South America [eastern MS + South + Northeast, Brazil]; ESA (13 samples): Eastern Brazil (SP, BA and MG); CSSA (15 samples): North-Central region of Argentina + Uruguay + Bolivia + western MS; NSWSA (20 samples): Chile + Southern and Western Argentina (20 samples); SCA (6 samples): Southern Central America (Costa Rica and Panama); NA+NCA (24 samples): North America + Northern Central America (Northern Costa Rica, Nicaragua, Guatemala, USA and Canada).
