# Supplementary material
Source: PubMed Central journal article supplement (PMC3873191)

Figure S1. Graph depicting the correlation between genetic and geographic distances calculated for *P. concolor* ND5 mtDNA sequences. (A) South America only. (B) Total sample.

A)

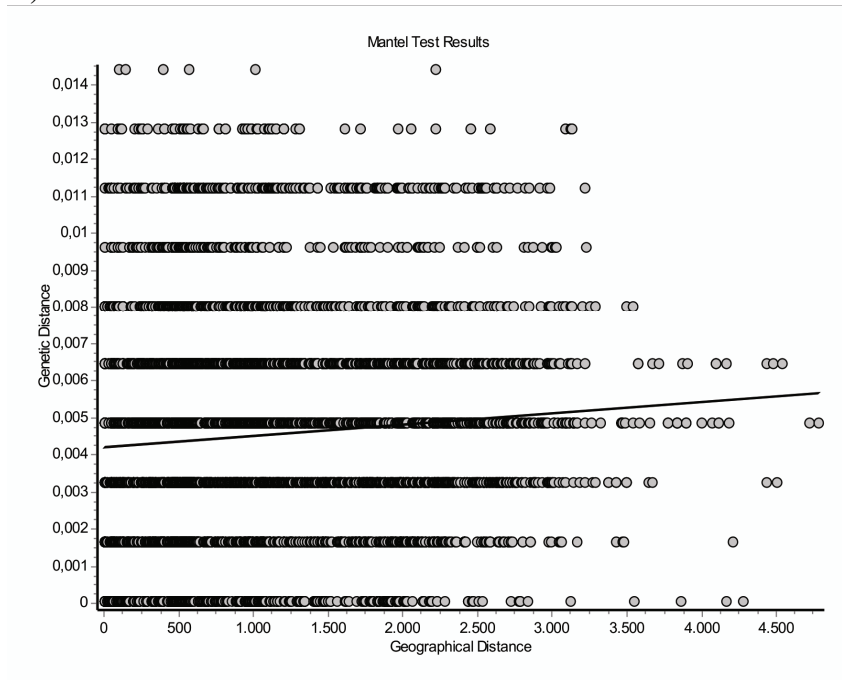

B)

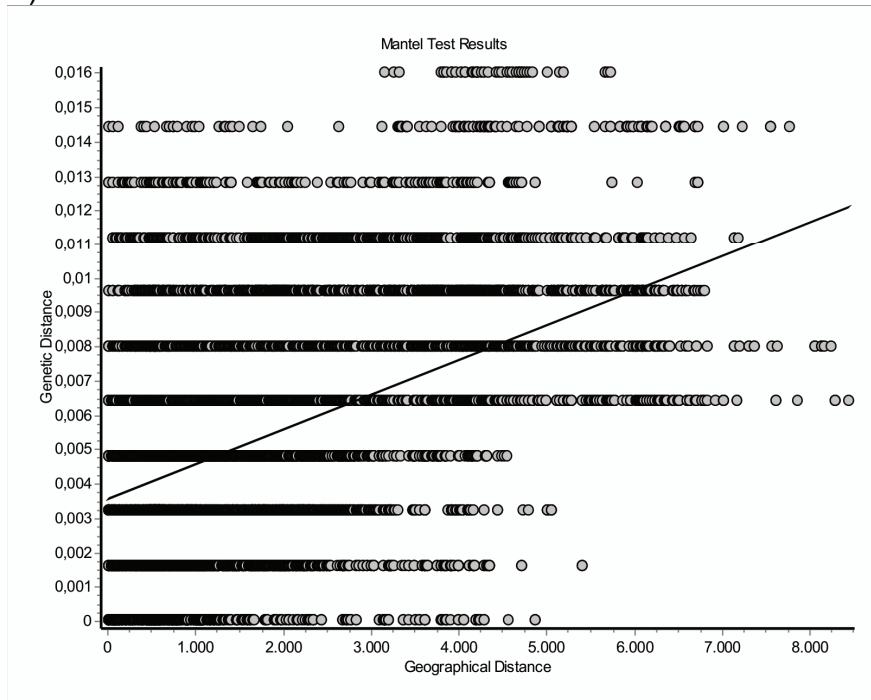

Supplement: gmb-36-586-s006.pdf [file gmb-36-586-s006.pdf]
